# Supplementary material for: 3D printing of resilient, lightweight and conductive MXene/reduced graphene oxide architectures for broadband electromagnetic interference shielding
Source: Royal Society of Chemistry journal article supplement (doi:10.1039/d2ta01388f), 2022-01-01
Supplement: d2ta01388f1.pdf [file d2ta01388f1.pdf]

## Supplementary Information

### **3D printing of resilient, lightweight and conductive MXene/reduced graphene oxide architectures for broadband electromagnetic interference shielding**

Yang Dai,<sup>a</sup> Hao-Bin Zhang,<sup>a\*</sup> Xinyu Wu,<sup>a</sup> Lulu Li,<sup>a</sup> Yu Zhang,<sup>b</sup> Zhiming Deng,<sup>b</sup> Zhong-Zhen Yu<sup>a,b</sup>

<sup>a</sup> State Key Laboratory of Organic-Inorganic Composites, College of Materials Science and Engineering, Beijing University of Chemical Technology, Beijing 100029, China

<sup>b</sup> Beijing Key Laboratory of Advanced Functional Polymer Composites, Beijing University of Chemical Technology, Beijing, 100029, China

E-mail: [zhanghaobin@buct.edu.cn](mailto:zhanghaobin@buct.edu.cn) (H.-B. Zhang)

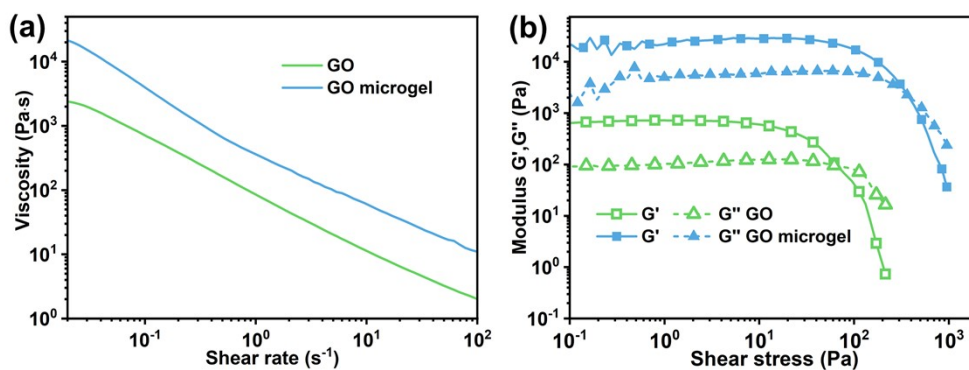

**Fig. S1.** (a) The viscosity and (b) storage modulus ( $G'$ ) and loss modulus ( $G''$ ) of GO suspension and GO microgel with a GO content of 2.5 wt%.

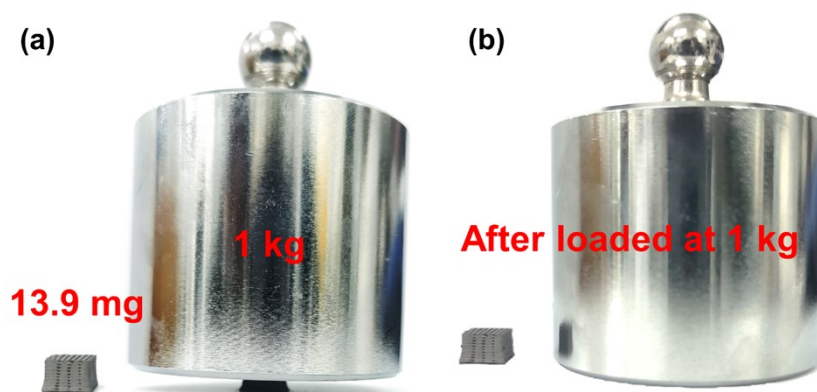

**Fig. S2.** The digital photos of printed scaffolds (a) loaded and (b) unloaded with 1kg.

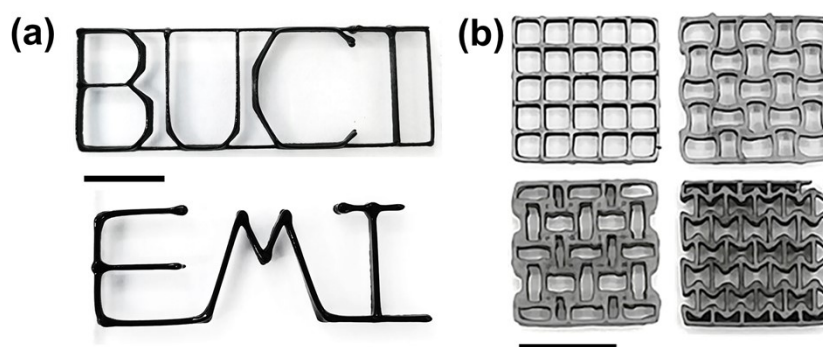

**Fig. S3.** The digital photos of printed patterns of (a) letters "BUCT" and "EMI" for 4 layers, (b) the different periodic structures of frame structure, curved concave polygon structure, four tangential antichiral structure and concave hexagon structure, the scale of the digital photos is 1 cm.

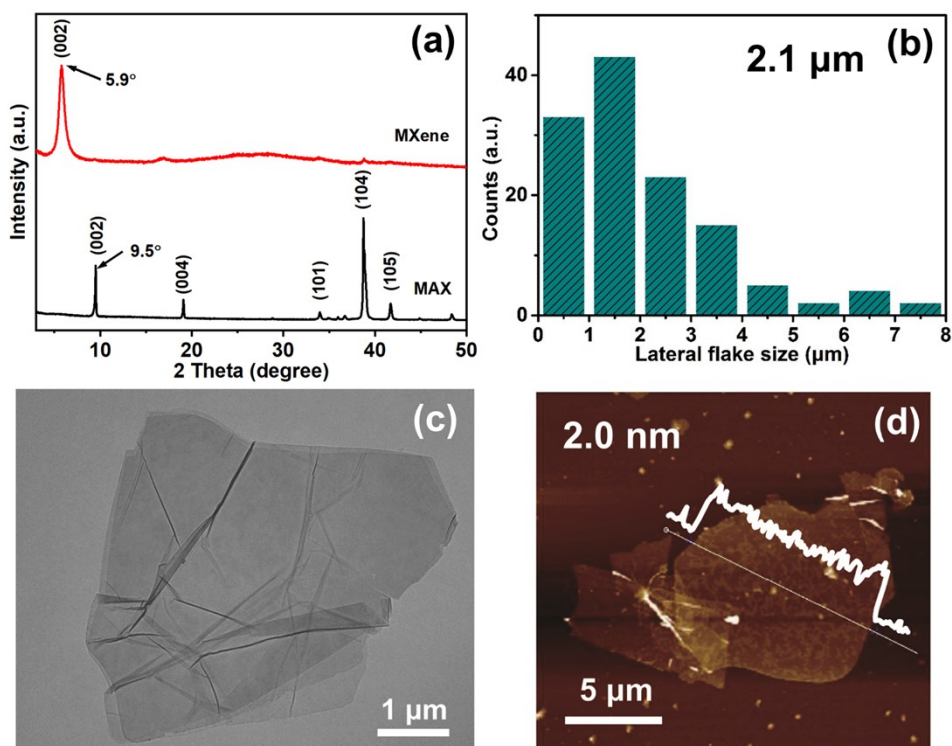

**Fig. S4.** The characteristic of MXene nanosheets. (a) XRD patterns of MAX and few-layered  $\text{Ti}_3\text{C}_2\text{T}_x$  MXene, (b) the histogram of lateral sizes of MXene flakes based on SEM images of diluted MXene suspension. (c) TEM image and (d) AFM image of MXene flakes.

The characteristic peaks (104) and (105) of  $\text{Ti}_3\text{AlC}_2$  almost disappear, and the significantly strengthened peak (002) shifts from  $9.5^\circ$  to  $5.9^\circ$ , corresponding to the layer spacing increasing from  $9.2 \text{ \AA}$  to  $15.2 \text{ \AA}$  (Figure S4a).

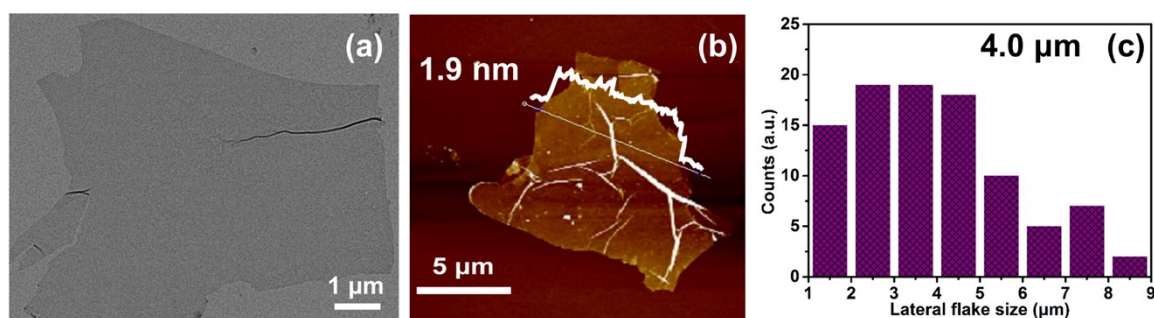

**Fig. S5.** The characteristic of GO nanosheets. (a) TEM image of GO, (b) AFM image of GO sheets, (c) histogram of lateral sizes of GO sheets on the basis of SEM images of diluted GO suspension.

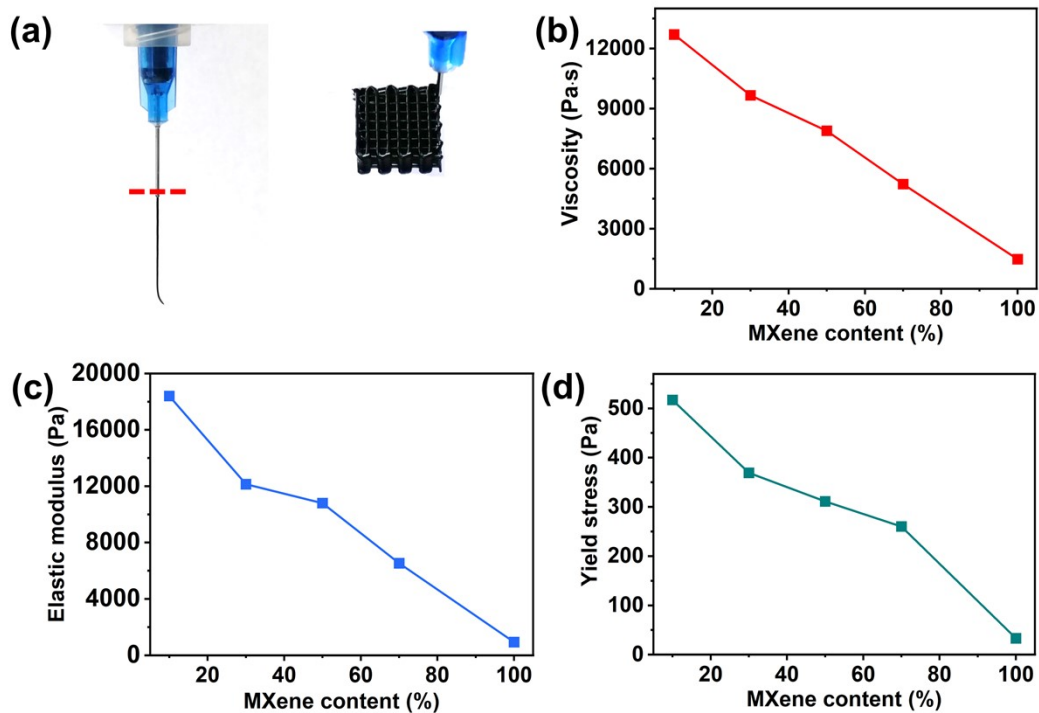

**Fig. S6.** (a) Photographs of the MXene/GO ink extruded from the needle and free-standing on the substrate. The values of (b) shear viscosity and (c) the elastic modulus ( $G'$ ) and (d) yield stress of the MXene/GO ink with different MXene contents.

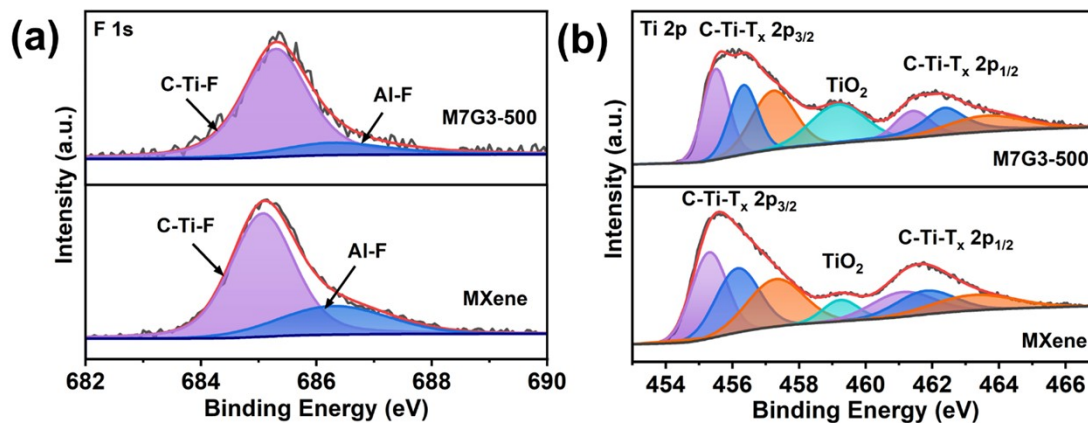

**Fig. S7.** The (a) F 1s and (b) Ti 2p spectra of MXene and M7G3-500.

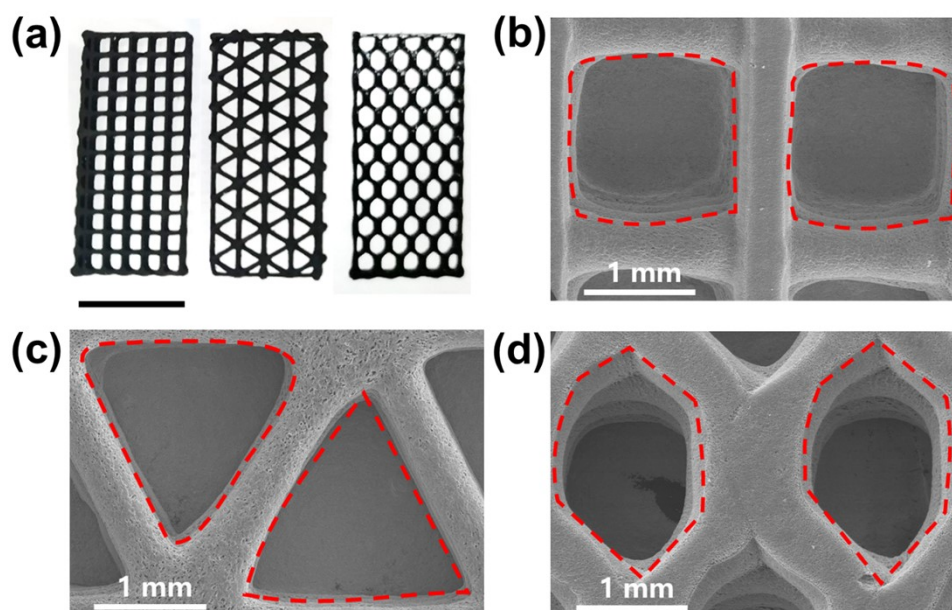

**Fig. S8.** (a) The photograph and SEM images in the top view of the MXene/RGO scaffolds with different cell geometries: (b) square, (c) triangle, (d) hexagon.

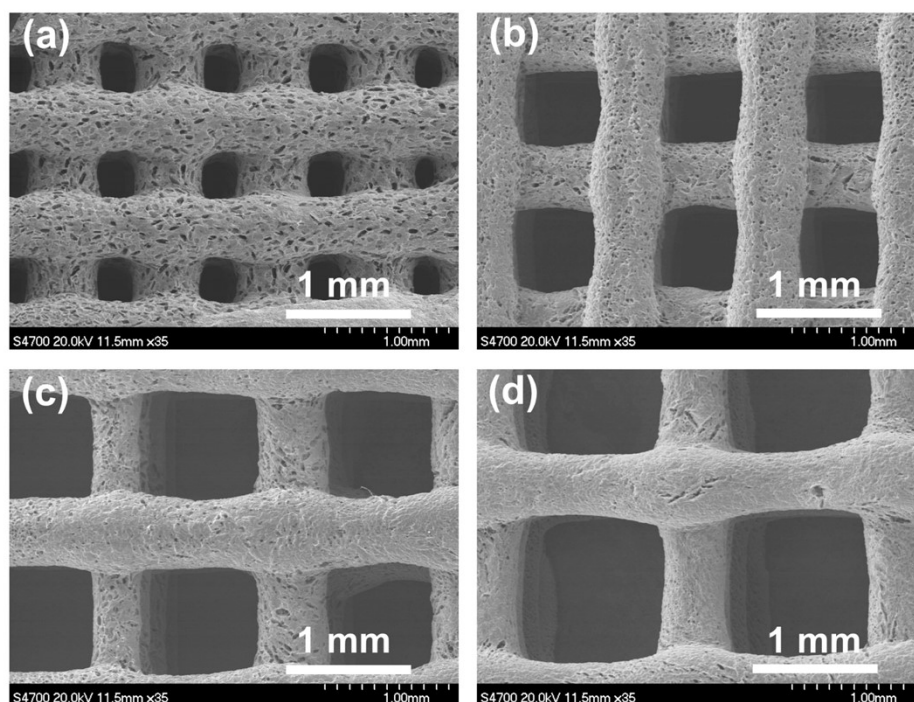

**Fig. S9.** The SEM images of M7G3-500 with filament spacings of: (a) 0.9 mm, (b) 1.2 mm, (c) 1.5 mm, (d) 1.8 mm.

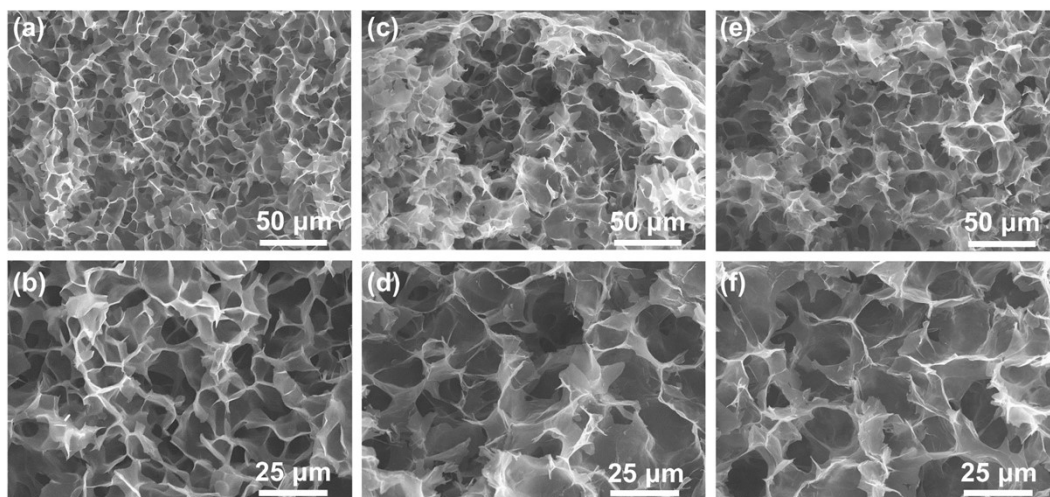

**Fig. S10.** The SEM images in the cross-sectional view of (a, b) M1G1, (c, d) M1G1-80, (e, f) M1G1-500.

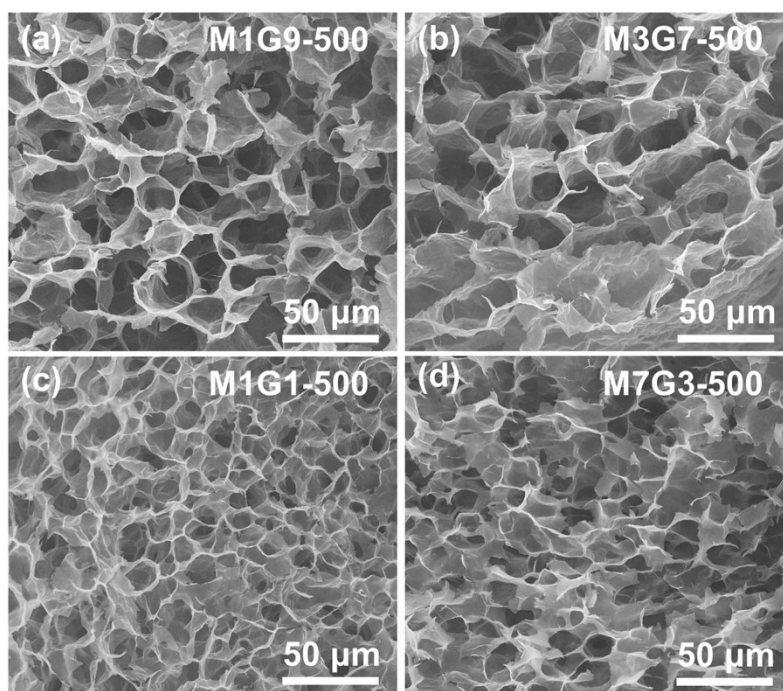

**Fig. S11.** The SEM images in cross-sectional view of (a) M1G9-500, (b) M3G7-500, (c) M1G1-50, (d) M7G3-500.

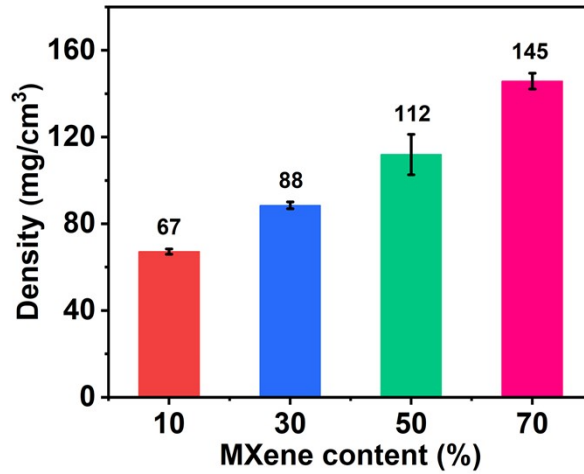

**Fig. S12.** The densities of MXene/RGO filaments with different MXene contents.

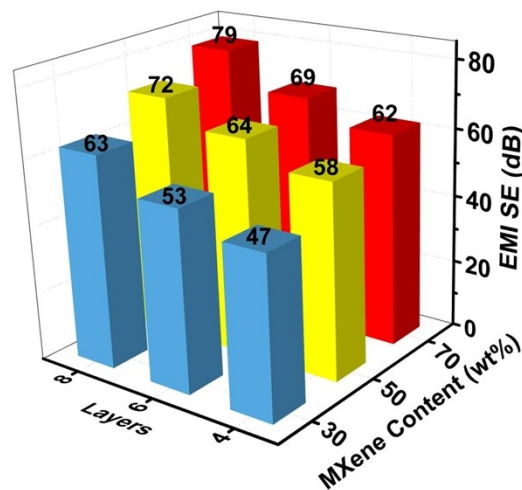

**Fig. S13.** The EMI SE values of the MXene/RGO scaffolds versus the MXene contents and the number of printed layers.

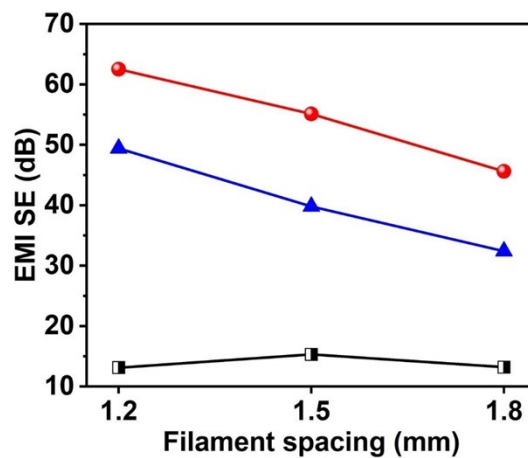

**Fig. S14.** The EMI SE values of M7G3-500 with different filament spacings in X-band.

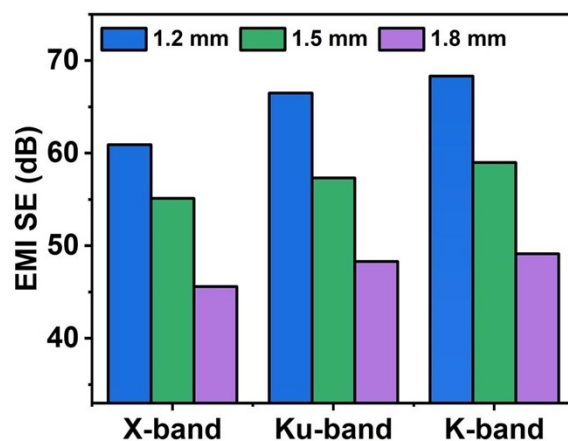

**Fig. S15.** The EMI SE values of M7G3-500 with different filament spacings in X-band, Ku-band, and K-band.

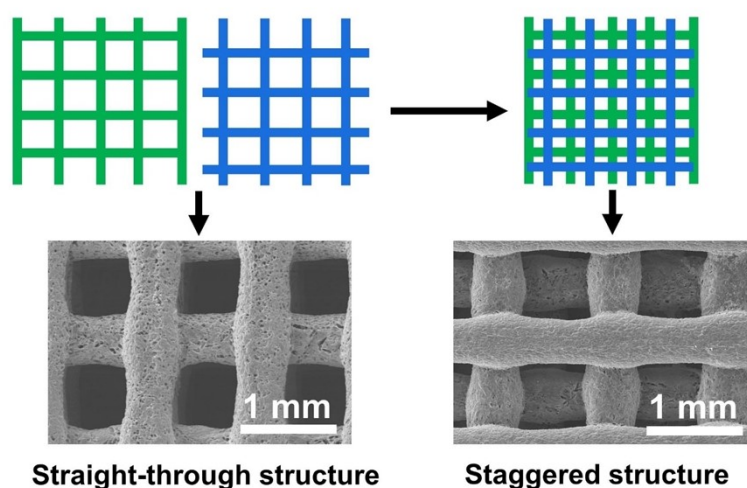

**Fig. S16.** Schematic and SEM images show the straight-through and staggered structure for M7G3-500.

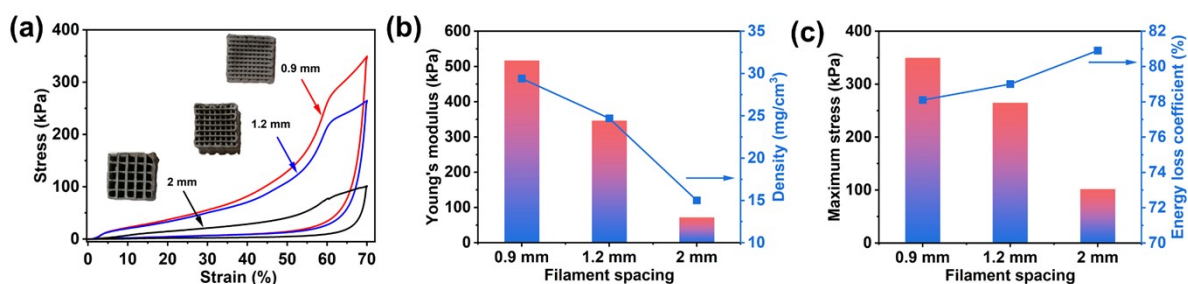

**Fig. S17.** (a) Compressive stress-strain curves, (b) Young's modulus and densities, and (c) the



maximum stresses and energy loss coefficients of M1G9-500 with the different filament spacings of 0.9 mm, 1.2 mm and 2 mm at 70% compression.

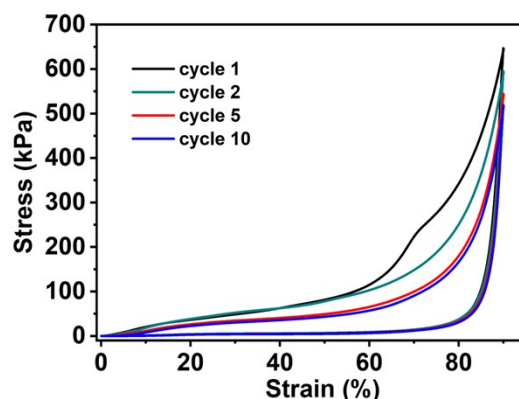

**Fig. S18.** The cyclic compression performance of M1G9-500 at 90% strain for 10 cycles.

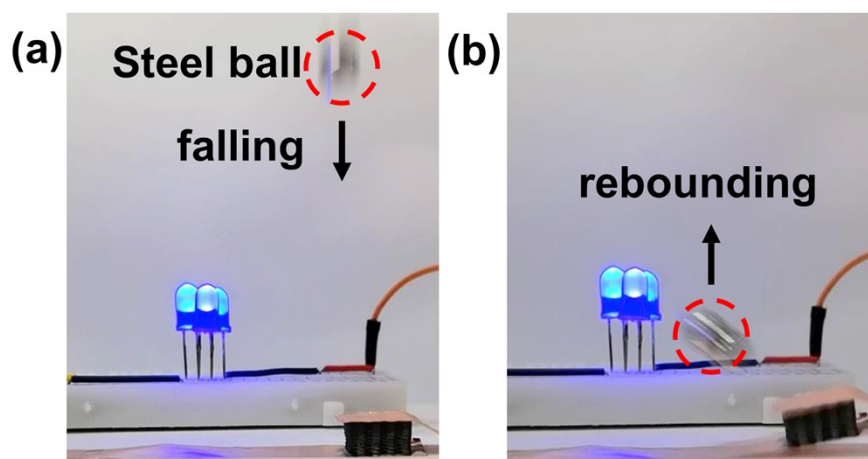

**Fig. S19.** The photographs of impact process of the MXene/RGO scaffold: (a) before and (b) after impacted by a steel ball (0.8 g). In the impact process, the LEDs maintain the similar brightness, indicating the robust structure with the anti-impacting protection property.

**Table S1.** The ink constituent of the printable MXene/GO ink.

| Samples | MXene mass (mg) | GO mass (mg) | AA mass (mg) | MXene-10% Mass (g) | GO-2.5% Mass (g) | Filler content (%) |
|---------|-----------------|--------------|--------------|--------------------|------------------|--------------------|
| M1G9    | 10              | 90           | 180          | 0.1                | 3.6              | 2.7                |
| M3G7    | 30              | 70           | 140          | 0.3                | 2.8              | 3.2                |

|      |    |    |     |     |     |     |
|------|----|----|-----|-----|-----|-----|
| M1G1 | 50 | 50 | 100 | 0.5 | 2.5 | 4.0 |
| M7G3 | 70 | 30 | 60  | 0.7 | 1.2 | 5.3 |

**Table S2.** Preparation methods and EMI shielding performance of typical 3D printed materials in 8.2-12.4 GHz.

| Materials                                   | Method | Electrical conductivity (S/m)     | EMI SE (dB) | Thickness (mm) | Density (g/cm <sup>3</sup> ) | SE/t (dB/mm) | SSE/t (dB cm <sup>2</sup> .g <sup>-1</sup> ) | Ref                  |
|---------------------------------------------|--------|-----------------------------------|-------------|----------------|------------------------------|--------------|----------------------------------------------|----------------------|
| CNT/CB/<br>ABS                              | FDM    | 1                                 | 16          | 2              | /                            | 8            | /                                            | 1                    |
| PLA/<br>graphene                            | FDM    | 4                                 | 16          | 1.2            | /                            | 13.3         | /                                            | 2                    |
| CNT/PLA                                     | FDM    | 20                                | 67.5        | 2.0            | /                            | 33.8         | /                                            | 3                    |
| CNT/PLA                                     | FDM    | 5000                              | 30          | 0.7            | 0.4                          | 42.9         | 214.3                                        | 4                    |
| Ag @ CNF/<br>PLA                            | FDM    | $2.1 \times 10^5$                 | 46          | ~0.7           | ~2                           | 65.7         | 328.6                                        | 5                    |
| PE/<br>graphene                             | FDM    | /                                 | 29          | 2.05           | 0.44                         | 2.05         | 318.0                                        | 6                    |
| PLA/GNPs/CN<br>Ts                           | FDM    | 82                                | 36.8        | 2              | /                            | 18.4         | /                                            | 7                    |
| PVA/GNP                                     | FDM    | 3.6                               | 31.7        | 2.43           | /                            | 13.0         | /                                            | 8                    |
| PLA/GNP                                     | FDM    | 30                                | 34.7        | 2              | /                            | 17.4         | /                                            | 9                    |
| Fe <sub>3</sub> O <sub>4</sub><br>/GMFs/HPC | FFF    | 580                               | 57.19       | 1.05           | /                            | 54.5         | /                                            | 10                   |
| Liquid metal/<br>elastomer                  | DIW    | $\sim 3.4 \times 10^6$<br>(EGaIn) | 82          | 9.5            | $\sim 6.4$<br>(EGaIn)        | 8.63         | /                                            | 11                   |
| CNT/CS                                      | DIW    | 4.1                               | 25.0        | 3              | 0.072                        | 8.3          | 1157.4                                       | 12                   |
| Graphene/<br>PDMS                           | DIW    | 50                                | 45          | 4.8            | /                            | 9.4          | /                                            | 13                   |
| MG frame                                    | DIW    | 5323                              | 76.2        | 2              | 0.105                        | 38.10        | 3628.6                                       | 14                   |
| MXene/PEO                                   | DIW    | /                                 | 23          | 0.101          | /                            | 227.7        | /                                            | 15                   |
| MXene/PEDOT<br>:PSS                         | DIW    | 1525.8                            | 51.7        | 0.295          | /                            | 175.3        | /                                            | 16                   |
| MXene/RGO<br>scaffold                       | DIW    | 73                                | 37.0        | 1.2            | 0.016                        | 30.8         | 19270.8                                      | <b>This<br/>work</b> |
|                                             |        | 357                               | 47.4        | 1.2            | 0.029                        | 39.5         | 13620.7                                      |                      |
|                                             |        | 771                               | 57.5        | 1.2            | 0.033                        | 47.9         | 14520.2                                      |                      |
|                                             |        | 1013                              | 62.5        | 1.4            | 0.038                        | 44.6         | 11748.1                                      |                      |

|      |      |     |       |      |        |
|------|------|-----|-------|------|--------|
| 1013 | 68.8 | 2.2 | 0.043 | 31.3 | 7272.7 |
| 1013 | 79.3 | 2.7 | 0.051 | 29.4 | 5758.9 |

**Table S3.** The EMI shielding performance of the MXene/RGO scaffolds.

(A) The effect of filament spacings in X-band, Ku-band, and K-band

| Spacing (mm) | Frequency (GHz) | Thickness (mm) | EMI SE (dB) |
|--------------|-----------------|----------------|-------------|
| 1.2          | 8.2-12.4        | 1.36           | 62.5        |
| 1.5          |                 | 1.35           | 55.1        |
| 1.8          |                 | 1.30           | 45.6        |
| 1.2          | 12.4-18         | 1.23           | 66.5        |
| 1.5          |                 | 1.21           | 57.4        |
| 1.8          |                 | 1.23           | 48.3        |
| 1.2          | 18-26.5         | 1.20           | 68.3        |
| 1.5          |                 | 1.29           | 59.0        |
| 1.8          |                 | 1.22           | 49.1        |

(B) The effect of stacking styles

| Samples | Thickness (mm) | EMI SE (dB) |
|---------|----------------|-------------|
| 4L      | 1.36           | 62.5        |
| S-4L    | 1.42           | 67.7        |
| S-6L    | 2.01           | 75.7        |
| S-8L    | 2.63           | 80.5        |

(C) The effect of Zigzag structure

| Samples | Thickness (mm) | EMI SE (dB) |
|---------|----------------|-------------|
| Z3      | 2.96           | 65.9        |
| Z5      | 2.32           | 71.2        |
| Z8      | 2.11           | 82.0        |

**Table S4.** The summary mechanical performance of the MXene/RGO scaffolds with different MXene content at 50% compression.

| MXene content (%) | Density (mg/cm <sup>3</sup> ) | Young's modulus (MPa) | Maximum strength (kPa) | Plastic deformation (%) |
|-------------------|-------------------------------|-----------------------|------------------------|-------------------------|
| 10                | 24.7                          | 0.463                 | 214.3                  | 0.5                     |
| 30                | 37.9                          | 0.636                 | 358.6                  | 3.1                     |

|    |      |       |       |      |
|----|------|-------|-------|------|
| 50 | 44.0 | 1.002 | 414.2 | 29.4 |
| 70 | 52.4 | 3.423 | 430.8 | 35.9 |

**Table S5.** The survey of the ink composition and mechanical performance of 3D printed materials.

| Ink composition               | Density (mg/cm <sup>3</sup> ) | Compressive strain (%) | Maximum Strength (kPa) | Cycles | Stress retention (%) | Ref              |
|-------------------------------|-------------------------------|------------------------|------------------------|--------|----------------------|------------------|
| GO + Urea                     | 47                            | 30                     | 15                     | 5      | 95                   | 17               |
| GO + CaCl <sub>2</sub>        | 10                            | 80                     | 90                     | 10     | 75.3                 | 18               |
| GO + resin                    | 43.8                          | /                      | /                      | /      | /                    | 19               |
| GO + CNT+ Ni(OH) <sub>2</sub> | 132.5                         | 60                     | 156.7                  | 10     | 79.9                 | 20               |
| GO                            | 10                            | 50                     | 83.6                   | 10     | 70.6                 | 21               |
| GO + Silica                   | 53                            | 50                     | 1194                   | 10     | 37.5                 | 22               |
| MXene                         | 15.69                         | 10                     | 0.98                   | 50     | 88.8                 | 23               |
| MXene + NiCoP                 | /                             | /                      | /                      | /      | /                    | 24               |
| MXene + ZnSO <sub>4</sub>     | /                             | /                      | /                      | /      | /                    | 25               |
| MXene+ GO+CNT                 | /                             | /                      | /                      | /      | /                    | 26               |
| MXene                         | 21.3                          | /                      | /                      | /      | /                    | 27               |
| MXene + GO                    | 24.7                          | 90                     | 646.8                  | 10     | 80.1                 | <b>This work</b> |

## References

1. D. P. Schmitz, L. G. Ecco, S. Dul, E. C. L. Pereira, B. G. Soares, G. M. O. Barra and A. Pegoretti, *Mater. Today Commun.*, 2018, **15**, 70-80.
2. K. Prashantha and F. Roger, *J. Macromol. Sci. A*, 2017, **54**, 24-29.
3. Y. Wang, Z. Fan, H. Zhang, J. Guo, D.-X. Yan, S. Wang, K. Dai, Z.-M. Li, *Mater. Des.*, 2021, **197**, 109222.
4. K. Chizari, M. Arjmand, Z. Liu, U. Sundararaj and D. Therriault, *Mater. Today Commun.*, 2017, **11**, 112-118.
5. H. Wei, X. Cauchy, I. O. Navas, Y. Abderrafai, K. Chizari, U. Sundararaj, Y. Liu, J. Leng and D. Therriault, *ACS Appl. Mater. Interfaces*, 2019, **11**, 24523-24532.
6. J. Jing, Y. Xiong, S. Shi, H. Pei, Y. Chen and P. Lambin, *Compos. Sci. Technol.*, 2021, **207**, 108732.
7. S. Shi, Z. Peng, J. Jing, L. Yang and Y. Chen, *ACS Sustainable Chem. Eng.*, 2020, **8**, 7962-7972.
8. L. Yang, Y. Chen, M. Wang, S. Shi and J. Jing, *Ind. Eng. Chem. Res.*, 2020, **59**, 8066-8077.
9. S. Shi, Z. Peng, J. Jing, L. Yang, Y. Chen, R. Kotsilkova and E. Ivanov, *Ind. Eng. Chem. Res.*, 2020,

- 59, 15565-15575.
10. M. Wajahat, J. H. Kim, J. Ahn, S. Lee, J. Bae, J. Pyo and S. K. Seol, *Carbon*, 2020, **167**, 278-284.
  11. Z. Wang, J. Ren, R. Liu, X. Sun, D. Huang, W. Xu, J. Jiang, K. Ma and Y. Liu, *Compos. Part A Appl. Sci. Manuf.*, 2020, **136**, 105957.
  12. X. Pei, M. Zhao, R. Li, H. Lu, R. Yu, Z. Xu, D. Li, Y. Tang and W. Xing, *Compos. Part A Appl. Sci. Manuf.*, 2021, **145**, 106363.
  13. Z. Wang, W. Yang, R. Liu, X. Zhang, H. Nie and Y. Liu, *Compos. Sci. Technol.*, 2021, **206**, 108652.
  14. X. Wu, T. Tu, Y. Dai, P. Tang, Y. Zhang, Z. Deng, L. Li, H.-B. Zhang and Z.-Z. Yu, *Nano-Micro Lett.*, 2021, **13**, 148.
  15. S. Y. Hong, Y. Sun, J. Lee, M. Yifei, M. Wang, J.-D. Nam and J. Suhr, *Polymer*, 2021, **236**, 124312.
  16. J. Liu, L. McKeon, J. Garcia, S. Pinilla, S. Barwich, M. Mobius, P. Stamenov, J. N. Coleman and V. Nicolosi, *Adv. Mater.*, 2022, **34**, 2106253.
  17. X. Tang, H. Zhou, Z. Cai, D. Cheng, P. He, P. Xie, D. Zhang and T. Fan, *ACS Nano*, 2018, **12**, 3502-3511.
  18. Y. Jiang, Z. Xu, T. Huang, Y. Liu, F. Guo, J. Xi, W. Gao, and C. Gao, *Adv. Funct. Mater.*, 2018, **28**, 1707024.
  19. R. M. Hensleigh, H. Cui, J. S. Oakdale, J. C. Ye, P. G. Campbell, E. B. Duoss, C. M. Spadaccini, X. Zheng and M. A. Worsley, *Mater. Horiz.*, 2018, **5**, 1035-1041.
  20. D. Kong, Y. Wang, S. Huang, B. Zhang, Y. V. Lim, G. J. Sim, Y. A. P. Valdivia, Q. Ge and H. Y. Yang, *ACS Nano*, 2020, **14**, 9675-9686.
  21. Q. Zhang, F. Zhang, S. P. Medarametla, H. Li, C. Zhou and D. Lin, *Small*, 2016, **12**, 1702-1708.
  22. C. Zhu, T. Y. Han, E. B. Duoss, A. M. Golobic, J. D. Kuntz, C. M. Spadaccini and M. A. Worsley, *Nat. Commun.*, 2015, **6**, 6962.
  23. H. Tetik, J. Orangi, G. Yang, K. Zhao, S. Bin Mujib, G. Singh, M. Beidaghi and D. Lin, *Adv. Mater.*, 2022, **34**, 2104980.
  24. L. Yu, W. Li, C. Wei, Q. Yang, Y. Shao and J. Sun, *Nano-Micro Lett.*, 2020, **12**, 143.
  25. Z. Fan, J. Jin, C. Li, J. Cai, C. Wei, Y. Shao, G. Zou and J. Sun, *ACS Nano*, 2021, **15**, 3098-3107.
  26. Z. Fan, C. Wei, L. Yu, Z. Xia, J. Cai, Z. Tian, G. Zou, S. X. Dou and J. Sun, *ACS Nano*, 2020, **14**, 867-876.
  27. C. Yang, X. Wu, H. Xia, J. Zhou, Y. Wu, R. Yang, G. Zhou and L. Qiu, *ACS Nano*, 2022, **16**, 2699-2710.
